# Supplementary material for: Complete Chloroplast Genome Sequences of Three Cleomaceae Species in China: Comparative and Phylogenetic Analysis
Source: Preprints.org preprint supplement (doi:10.20944/preprints202408.1969.v1), 2024-08-28
Supplement: Supplementary file 1 [file supplementary]

## Sheet: Sheet1
Sieruela_rutidosperma										Corynandra_viscosa										Gynandropsis_gynandra
ID	Repeat I Start	Repeat II Start	Type	Size(bp)	Distance	E-Value	Gene	Region		ID	Repeat I Start	Repeat II Start	Type	Size(bp)	Distance	E-Value	Gene	Region		ID	Repeat I Start	Repeat II Start	Type	Size(bp)	Distance	E-Value	Gene	Region
1	86423	130991	P	26083	0	0	-	ir		1	87179	131858	P	26184	0	0	-	ir		1	87243	131972	P	26181	0	0	-	ir
2	39843	42067	F	76	-3	2.31e-30	psaB;psaA	LSC;LSC		2	40301	42525	F	73	-2	1.86e-30	psaB;psaA	LSC;LSC		2	40291	42515	F	76	-3	2.34e-30	psaB;psaA	LSC;LSC
3	39852	42076	F	67	-2	6.34e-27	psaB;psaA	LSC;LSC		3	40310	42534	F	64	-1	3.96e-27	psaB;psaA	LSC;LSC		3	40300	42524	F	67	-2	6.43e-27	psaB;psaA	LSC;LSC
4	43996	44042	F	54	0	2.14e-23	ycf3;ycf3	LSC;LSC		4	37853	37853	P	43	-3	3.03e-11	IGS	LSC;LSC		4	92138	92162	F	65	-3	6.1e-24	ycf2;ycf2	IRb;IRb
5	44068	44068	P	50	0	5.47e-21	ycf3;ycf3	LSC;LSC		5	96925	96925	P	43	-3	3.03e-11	IGS	IRb;IRb		5	92138	153169	P	65	-3	6.1e-24	ycf2;ycf2	IRb;IRa
6	76265	76265	P	49	-1	3.22e-18	trnH-GUG;trnH-GUG	LSC;LSC		6	96925	148253	F	43	-3	3.03e-11	IGS	IRb;IRa		6	92162	153193	P	65	-3	6.1e-24	ycf2;ycf2	IRb;IRa
7	47856	47856	P	47	-3	1.53e-13	trnH-GUG;trnH-GUG	LSC;LSC		7	148253	148253	P	43	-3	3.03e-11	IGS	IRa;IRa		7	153169	153193	F	65	-3	6.1e-24	ycf2;ycf2	IRa;IRa
8	96149	96149	P	43	-3	2.99e-11	trnH-GUG;trnH-GUG	IRb;IRb		8	92073	92097	F	41	-3	4.18e-10	ycf2;ycf2	IRb;IRb		8	29848	29848	P	52	-2	4.14e-18	trnH-GUG;trnH-GUG	LSC;LSC
9	96149	147305	F	43	-3	2.99e-11	trnH-GUG;trnH-GUG	IRb;IRa		9	92073	153083	P	41	-3	4.18e-10	ycf2;ycf2	IRb;IRa		9	77090	77090	P	50	0	5.55e-21	trnH-GUG;trnH-GUG	LSC;LSC
10	147305	147305	P	43	-3	2.99e-11	trnH-GUG;trnH-GUG	IRa;IRa		10	92097	153107	P	41	-3	4.18e-10	ycf2;ycf2	IRb;IRa		10	58459	58459	P	44	-2	1.94e-13	trnH-GUG;trnH-GUG	LSC;LSC
11	44067	44067	P	40	-2	4.03e-11	ycf3;ycf3	LSC;LSC		11	153083	153107	F	41	-3	4.18e-10	ycf2;ycf2	IRa;IRa		11	96987	96987	P	43	-3	3.03e-11	trnH-GUG;trnH-GUG	IRb;IRb
12	44067	44079	F	39	-2	1.53e-10	ycf3;ycf3	LSC;LSC		12	32957	32957	P	40	-2	4.08e-11	IGS	LSC;LSC		12	96987	148366	F	43	-3	3.03e-11	trnH-GUG;trnH-GUG	IRb;IRa
13	44971	100767	F	39	-3	5.67e-09	trnH-GUG;trnH-GUG	LSC;IRb		13	45397	101551	F	39	-3	5.74e-09	ycf3;IGS	LSC;IRb		13	148366	148366	P	43	-3	3.03e-11	trnH-GUG;trnH-GUG	IRa;IRa
14	44971	142691	P	39	-3	5.67e-09	trnH-GUG;trnH-GUG	LSC;IRa		14	45397	143631	P	39	-3	5.74e-09	ycf3;IGS	LSC;IRa		14	92138	92186	F	41	-3	4.19e-10	ycf2;ycf2	IRb;IRb
15	53506	53506	P	39	-3	5.67e-09	trnH-GUG;trnH-GUG	LSC;LSC		15	5091	5091	P	36	-2	8.43e-09	IGS	LSC;LSC		15	153169	153217	F	41	-3	4.19e-10	ycf2;ycf2	IRa;IRa
16	5108	5114	R	39	-3	5.67e-09	trnH-GUG;trnH-GUG	LSC;LSC		16	101554	123866	F	36	-3	2.87e-07	IGS;ndhA	IRb;SSC		16	37798	37847	F	39	-3	5.74e-09	trnH-GUG;trnH-GUG	LSC;LSC
17	44080	44080	P	38	-2	5.81e-10	ycf3;ycf3	LSC;LSC		17	123866	143631	P	36	-3	2.87e-07	ndhA;IGS	SSC;IRa		17	45390	101625	F	39	-3	5.74e-09	trnH-GUG;trnH-GUG	LSC;IRb
18	5107	5116	P	37	-3	7.71e-08	trnH-GUG;trnH-GUG	LSC;LSC		18	49127	49127	P	35	-3	1.05e-06	trnL-UAA;trnL-UAA	LSC;LSC		18	45390	143732	P	39	-3	5.74e-09	trnH-GUG;trnH-GUG	LSC;IRa
19	48675	48675	P	36	-2	8.33e-09	trnL-UAA;trnL-UAA	LSC;LSC		19	6792	6792	P	34	-2	1.2e-07	IGS	LSC;LSC		19	4945	4945	P	36	-2	8.45e-09	trnH-GUG;trnH-GUG	LSC;LSC
20	100770	123021	F	36	-3	2.83e-07	trnH-GUG;trnH-GUG	IRb;SSC		20	65270	65270	P	34	-2	1.2e-07	IGS	LSC;LSC		20	101628	123956	F	36	-3	2.87e-07	trnH-GUG;trnH-GUG	IRb;SSC
21	123021	142691	P	36	-3	2.83e-07	trnH-GUG;trnH-GUG	SSC;IRa		21	85121	85121	P	34	-2	1.2e-07	IGS	LSC;LSC		21	123956	143732	P	36	-3	2.87e-07	trnH-GUG;trnH-GUG	SSC;IRa
22	37377	37377	P	35	-3	1.04e-06	trnH-GUG;trnH-GUG	LSC;LSC		22	110669	110701	F	34	-2	1.2e-07	IGS	IRb;IRb		22	121	174	P	35	-2	3.19e-08	trnH-GUG;trnH-GUG	LSC;LSC
23	109887	109919	F	34	-2	1.19e-07	trnH-GUG;trnH-GUG	IRb;IRb		23	110669	134486	P	34	-2	1.2e-07	IGS	IRb;IRa		23	65282	65282	P	34	-2	1.2e-07	trnH-GUG;trnH-GUG	LSC;LSC
24	109887	133544	P	34	-2	1.19e-07	trnH-GUG;trnH-GUG	IRb;IRa		24	110701	134518	P	34	-2	1.2e-07	IGS	IRb;IRa		24	97020	97020	P	33	-1	9.44e-09	trnH-GUG;trnH-GUG	IRb;IRb
25	109919	133576	P	34	-2	1.19e-07	trnH-GUG;trnH-GUG	IRb;IRa		25	134486	134518	F	34	-2	1.2e-07	IGS	IRa;IRa		25	97020	148343	F	33	-1	9.44e-09	trnH-GUG;trnH-GUG	IRb;IRa
26	133544	133576	F	34	-2	1.19e-07	trnH-GUG;trnH-GUG	IRa;IRa		26	96958	96958	P	33	-1	9.43e-09	IGS	IRb;IRb		26	148343	148343	P	33	-1	9.44e-09	trnH-GUG;trnH-GUG	IRa;IRa
27	96182	96182	P	33	-1	9.31e-09	trnH-GUG;trnH-GUG	IRb;IRb		27	96958	148230	F	33	-1	9.43e-09	IGS	IRb;IRa		27	80773	80773	R	33	-2	4.53e-07	rpoA;rpoA	LSC;LSC
28	96182	147282	F	33	-1	9.31e-09	trnH-GUG;trnH-GUG	IRb;IRa		28	148230	148230	P	33	-1	9.43e-09	IGS	IRa;IRa		28	121707	121708	C	33	-2	4.53e-07	trnH-GUG;trnH-GUG	SSC;SSC
29	147282	147282	P	33	-1	9.31e-09	trnH-GUG;trnH-GUG	IRa;IRa		29	61149	61158	F	33	-2	4.52e-07	IGS	LSC;LSC		29	7804	7804	P	32	0	3.81e-10	trnH-GUG;trnH-GUG	LSC;LSC
30	8349	36445	F	33	-3	1.39e-05	trnS-AGC;trnS-UGA	LSC;LSC		30	128916	128921	P	33	-3	1.4e-05	ycf1;ycf1	SSC;SSC		30	8166	36862	F	32	-3	5.11e-05	trnS-GCU;trnS-UGA	LSC;LSC
31	128046	128051	P	33	-3	1.39e-05	ycf1;ycf1	SSC;SSC		31	80696	80696	R	33	-2	4.52e-07	rpoA;rpoA	LSC;LSC		31	37679	37679	R	32	-2	1.7e-06	trnH-GUG;trnH-GUG	LSC;LSC
32	79958	79958	R	33	-2	4.47e-07	rpoA;rpoA	LSC;LSC		32	92119	92140	F	32	-2	1.7e-06	ycf2;ycf2	IRb;IRb		32	44534	44537	P	31	-2	6.38e-06	ycf3;ycf3	LSC;LSC
33	5256	5256	P	32	-2	1.68e-06	trnH-GUG;trnH-GUG	LSC;LSC		33	92119	153049	P	32	-2	1.7e-06	ycf2;ycf2	IRb;IRa		33	52287	52287	R	31	-2	6.38e-06	trnH-GUG;trnH-GUG	LSC;LSC
34	91338	91359	F	32	-2	1.68e-06	ycf2;ycf2	IRb;IRb		34	92140	153070	P	32	-2	1.7e-06	ycf2;ycf2	IRb;IRa		34	101997	101997	R	31	-2	6.38e-06	trnH-GUG;trnH-GUG	IRb;IRb
35	91338	152106	P	32	-2	1.68e-06	ycf2;ycf2	IRb;IRa		35	153049	153070	F	32	-2	1.7e-06	ycf2;ycf2	IRa;IRa		35	121707	121707	R	31	-2	6.38e-06	trnH-GUG;trnH-GUG	SSC;SSC
36	91359	152127	P	32	-2	1.68e-06	ycf2;ycf2	IRb;IRa		36	8275	36903	F	32	-3	5.1e-05	trnS-GCU;trnS-UGA	LSC;LSC		36	143368	143368	R	31	-2	6.38e-06	trnH-GUG;trnH-GUG	IRa;IRa
37	152106	152127	F	32	-2	1.68e-06	ycf2;ycf2	IRa;IRa		37	47462	48448	F	32	-3	5.1e-05	IGS	LSC;LSC		37	4873	4875	R	31	-3	0.000185	trnH-GUG;trnH-GUG	LSC;LSC
38	44019	44077	F	31	-2	6.3e-06	ycf3;ycf3	LSC;LSC		38	10297	10388	F	31	-3	0.000185	IGS;atpA	LSC;LSC		38	60918	60920	R	31	-3	0.000185	trnH-GUG;trnH-GUG	LSC;LSC
39	44019	44078	P	31	-2	6.3e-06	ycf3;ycf3	LSC;LSC		39	29575	116237	F	31	-3	0.000185	IGS	LSC;SSC		39	101997	143368	C	31	-2	6.38e-06	trnH-GUG;trnH-GUG	IRb;IRa
40	5100	5122	F	31	-3	0.000183	trnH-GUG;trnH-GUG	LSC;LSC		40	52356	52365	P	31	-3	0.000185	IGS	LSC;LSC		40	121707	121707	P	30	0	6.1e-09	trnH-GUG;trnH-GUG	SSC;SSC
41	127350	127350	R	31	-2	6.3e-06	ycf1;ycf1	SSC;SSC		41	118814	118839	F	31	-3	0.000185	IGS	SSC;SSC		41	8168	46495	P	30	-1	5.49e-07	trnS-GCU;trnS-GGA	LSC;LSC
42	8355	46060	P	30	-1	5.42e-07	trnS-AGC;trnS-UCC	LSC;LSC		42	85119	85124	R	31	-3	0.000185	IGS	LSC;LSC		42	1818	1819	P	30	-2	2.39e-05	trnK-UUU;trnK-UUU	LSC;LSC
43	8648	8660	F	30	-2	2.36e-05	trnH-GUG;trnH-GUG	LSC;LSC		43	116222	116234	R	31	-3	0.000185	IGS	SSC;SSC		43	5536	5536	P	30	-2	2.39e-05	rps16;rps16	LSC;LSC
44	44020	44090	P	30	-2	2.36e-05	ycf3;ycf3	LSC;LSC		44	8277	46481	P	30	-1	5.48e-07	trnS-GCU;trnS-GGA	LSC;LSC		44	32653	32653	P	30	-2	2.39e-05	trnH-GUG;trnH-GUG	LSC;LSC
45	44983	100779	F	30	-2	2.36e-05	trnH-GUG;trnH-GUG	LSC;IRb		45	8487	8511	F	30	-2	2.39e-05	IGS	LSC;LSC		45	45402	101637	F	30	-2	2.39e-05	trnH-GUG;trnH-GUG	LSC;IRb
46	44983	142688	P	30	-2	2.36e-05	trnH-GUG;trnH-GUG	LSC;IRa		46	45409	101563	F	30	-2	2.39e-05	ycf3;IGS	LSC;IRb		46	45402	143729	P	30	-2	2.39e-05	trnH-GUG;trnH-GUG	LSC;IRa
47	299	353	P	30	-3	0.00066	trnH-GUG;trnH-GUG	LSC;LSC		47	45409	143628	P	30	-2	2.39e-05	ycf3;IGS	LSC;IRa		47	74811	74836	F	30	-2	2.39e-05	trnH-GUG;trnH-GUG	LSC;LSC
48	14811	65203	F	30	-3	0.00066	trnH-GUG;trnH-GUG	LSC;LSC		48	317	379	P	30	-3	0.000668	IGS	LSC;LSC		48	117145	117145	P	30	-2	2.39e-05	trnH-GUG;trnH-GUG	SSC;SSC
49	36451	46060	P	30	-3	0.00066	trnS-UGA;trnS-UCC	LSC;LSC		49	6810	124453	P	30	-3	0.000668	IGS;ndhA	LSC;SSC		49	9815	9849	P	30	-3	0.000669	trnH-GUG;trnH-GUG	LSC;LSC
50	44019	44067	P	30	-3	0.00066	ycf3;ycf3	LSC;LSC		50	29562	51701	F	30	-3	0.000668	IGS	LSC;LSC		50	10061	43893	P	30	-3	0.000669	trnH-GUG;trnH-GUG	LSC;LSC
51	44065	44067	P	30	-3	0.00066	ycf3;ycf3	LSC;LSC		51	29574	116237	F	30	-3	0.000668	IGS	LSC;SSC		51	14443	14457	F	30	-3	0.000669	trnH-GUG;trnH-GUG	LSC;LSC
52	37251	37257	R	30	-3	0.00066	trnH-GUG;trnH-GUG	LSC;LSC		52	36905	46481	P	30	-3	0.000668	trnS-UGA;trnS-GGA	LSC;LSC		52	14755	29432	F	30	-3	0.000669	trnH-GUG;trnH-GUG	LSC;LSC
53	69744	120757	R	30	-3	0.00066	trnH-GUG;trnH-GUG	LSC;SSC		53	51694	128219	F	30	-3	0.000668	IGS;ycf1	LSC;SSC		53	36864	46495	P	30	-3	0.000669	trnS-UGA;trnS-GGA	LSC;LSC
54	129214	129215	R	30	-3	0.00066	ycf1;ycf1	SSC;SSC		54	62740	62763	F	30	-3	0.000668	IGS	LSC;LSC		54	60916	83538	F	30	-3	0.000669	trnH-GUG;trnH-GUG	LSC;LSC
55	120758	120759	C	30	-3	0.00066	trnH-GUG;trnH-GUG	SSC;SSC		55	52428	52439	R	30	-3	0.000668	IGS	LSC;LSC		55	67345	67365	F	30	-3	0.000669	trnH-GUG;trnH-GUG	LSC;LSC
										56	101920	101921	R	30	-3	0.000668	IGS	IRb;IRb		56	29429	130191	R	30	-3	0.000669	trnH-GUG;trnH-GUG	LSC;SSC
										57	128212	128213	R	30	-3	0.000668	ycf1;ycf1	SSC;SSC		57	121706	121707	R	30	-3	0.000669	trnH-GUG;trnH-GUG	SSC;SSC
										58	143270	143271	R	30	-3	0.000668	IGS	IRa;IRa		58	124540	129828	R	30	-3	0.000669	ndhA;ycf1	SSC;SSC
										59	101920	143270	C	30	-3	0.000668	IGS	IRb;IRa

## Sheet: Sheet2
Table S4. Long repeats in the complete chloroplast genomes of Corynandra viscosa, Sieruela rutidosperma, and Gynandropsis gynandra.
Species	ID	Repeat I Start	Repeat II Start	Type	Size(bp)	Distance	E-Value	Gene	Region
Sieruela rutidosperma	1	86423	130991	P	26083	0	0	-	ir
	2	39843	42067	F	76	-3	2.31×10-30	psaB;psaA	LSC;LSC
	3	39852	42076	F	67	-2	6.34×10-27	psaB;psaA	LSC;LSC
	4	43996	44042	F	54	0	2.14×10-23	ycf3;ycf3	LSC;LSC
	5	44068	44068	P	50	0	5.47×10-21	ycf3;ycf3	LSC;LSC
	6	76265	76265	P	49	-1	3.22×10-18	trnH-GUG;trnH-GUG	LSC;LSC
	7	47856	47856	P	47	-3	1.53×10-13	trnH-GUG;trnH-GUG	LSC;LSC
	8	96149	96149	P	43	-3	2.99×10-11	trnH-GUG;trnH-GUG	IRb;IRb
	9	96149	147305	F	43	-3	2.99×10-11	trnH-GUG;trnH-GUG	IRb;IRa
	10	147305	147305	P	43	-3	2.99×10-11	trnH-GUG;trnH-GUG	IRa;IRa
	11	44067	44067	P	40	-2	4.03×10-11	ycf3;ycf3	LSC;LSC
	12	44067	44079	F	39	-2	1.53×10-10	ycf3;ycf3	LSC;LSC
	13	44971	100767	F	39	-3	5.67×10-9	trnH-GUG;trnH-GUG	LSC;IRb
	14	44971	142691	P	39	-3	5.67×10-9	trnH-GUG;trnH-GUG	LSC;IRa
	15	53506	53506	P	39	-3	5.67×10-9	trnH-GUG;trnH-GUG	LSC;LSC
	16	5108	5114	R	39	-3	5.67×10-9	trnH-GUG;trnH-GUG	LSC;LSC
	17	44080	44080	P	38	-2	5.81×10-10	ycf3;ycf3	LSC;LSC
	18	5107	5116	P	37	-3	7.71×10-8	trnH-GUG;trnH-GUG	LSC;LSC
	19	48675	48675	P	36	-2	8.33×10-9	trnL-UAA;trnL-UAA	LSC;LSC
	20	100770	123021	F	36	-3	2.83×10-7	trnH-GUG;trnH-GUG	IRb;SSC
	21	123021	142691	P	36	-3	2.83×10-7	trnH-GUG;trnH-GUG	SSC;IRa
	22	37377	37377	P	35	-3	1.04×10-6	trnH-GUG;trnH-GUG	LSC;LSC
	23	109887	109919	F	34	-2	1.19×10-7	trnH-GUG;trnH-GUG	IRb;IRb
	24	109887	133544	P	34	-2	1.19×10-7	trnH-GUG;trnH-GUG	IRb;IRa
	25	109919	133576	P	34	-2	1.19×10-7	trnH-GUG;trnH-GUG	IRb;IRa
	26	133544	133576	F	34	-2	1.19×10-7	trnH-GUG;trnH-GUG	IRa;IRa
	27	96182	96182	P	33	-1	9.31×10-09	trnH-GUG;trnH-GUG	IRb;IRb
	28	96182	147282	F	33	-1	9.31×10-09	trnH-GUG;trnH-GUG	IRb;IRa
	29	147282	147282	P	33	-1	9.31×10-09	trnH-GUG;trnH-GUG	IRa;IRa
	30	8349	36445	F	33	-3	1.39×10-5	trnS-AGC;trnS-UGA	LSC;LSC
	31	128046	128051	P	33	-3	1.39×10-5	ycf1;ycf1	SSC;SSC
	32	79958	79958	R	33	-2	4.47×10-7	rpoA;rpoA	LSC;LSC
	33	5256	5256	P	32	-2	1.68×10-6	trnH-GUG;trnH-GUG	LSC;LSC
	34	91338	91359	F	32	-2	1.68×10-6	ycf2;ycf2	IRb;IRb
	35	91338	152106	P	32	-2	1.68×10-6	ycf2;ycf2	IRb;IRa
	36	91359	152127	P	32	-2	1.68×10-6	ycf2;ycf2	IRb;IRa
	37	152106	152127	F	32	-2	1.68×10-6	ycf2;ycf2	IRa;IRa
	38	44019	44077	F	31	-2	6.3×10-6	ycf3;ycf3	LSC;LSC
	39	44019	44078	P	31	-2	6.3×10-6	ycf3;ycf3	LSC;LSC
	40	5100	5122	F	31	-3	1.83×10-4	trnH-GUG;trnH-GUG	LSC;LSC
	41	127350	127350	R	31	-2	6.3×10-6	ycf1;ycf1	SSC;SSC
	42	8355	46060	P	30	-1	5.42×10-7	trnS-AGC;trnS-UCC	LSC;LSC
	43	8648	8660	F	30	-2	2.36×10-5	trnH-GUG;trnH-GUG	LSC;LSC
	44	44020	44090	P	30	-2	2.36×10-5	ycf3;ycf3	LSC;LSC
	45	44983	100779	F	30	-2	2.36×10-5	trnH-GUG;trnH-GUG	LSC;IRb
	46	44983	142688	P	30	-2	2.36×10-5	trnH-GUG;trnH-GUG	LSC;IRa
	47	299	353	P	30	-3	6.6×10-4	trnH-GUG;trnH-GUG	LSC;LSC
	48	14811	65203	F	30	-3	6.6×10-4	trnH-GUG;trnH-GUG	LSC;LSC
	49	36451	46060	P	30	-3	6.6×10-4	trnS-UGA;trnS-UCC	LSC;LSC
	50	44019	44067	P	30	-3	6.6×10-4	ycf3;ycf3	LSC;LSC
	51	44065	44067	P	30	-3	6.6×10-4	ycf3;ycf3	LSC;LSC
	52	37251	37257	R	30	-3	6.6×10-4	trnH-GUG;trnH-GUG	LSC;LSC
	53	69744	120757	R	30	-3	6.6×10-4	trnH-GUG;trnH-GUG	LSC;SSC
	54	129214	129215	R	30	-3	6.6×10-4	ycf1;ycf1	SSC;SSC
	55	120758	120759	C	30	-3	6.6×10-4	trnH-GUG;trnH-GUG	SSC;SSC
Corynandra viscosa	1	87179	131858	P	26184	0	0	-	ir
	2	40301	42525	F	73	-2	1.86×10-30	psaB;psaA	LSC;LSC
	3	40310	42534	F	64	-1	3.96×10-27	psaB;psaA	LSC;LSC
	4	37853	37853	P	43	-3	3.03×10-11	IGS	LSC;LSC
	5	96925	96925	P	43	-3	3.03×10-11	IGS	IRb;IRb
	6	96925	148253	F	43	-3	3.03×10-11	IGS	IRb;IRa
	7	148253	148253	P	43	-3	3.03×10-11	IGS	IRa;IRa
	8	92073	92097	F	41	-3	4.18×10-10	ycf2;ycf2	IRb;IRb
	9	92073	153083	P	41	-3	4.18×10-10	ycf2;ycf2	IRb;IRa
	10	92097	153107	P	41	-3	4.18×10-10	ycf2;ycf2	IRb;IRa
	11	153083	153107	F	41	-3	4.18×10-10	ycf2;ycf2	IRa;IRa
	12	32957	32957	P	40	-2	4.08×10-11	IGS	LSC;LSC
	13	45397	101551	F	39	-3	5.74×10-9	ycf3;IGS	LSC;IRb
	14	45397	143631	P	39	-3	5.74×10-9	ycf3;IGS	LSC;IRa
	15	5091	5091	P	36	-2	8.43×10-9	IGS	LSC;LSC
	16	101554	123866	F	36	-3	2.87×10-7	IGS;ndhA	IRb;SSC
	17	123866	143631	P	36	-3	2.87×10-7	ndhA;IGS	SSC;IRa
	18	49127	49127	P	35	-3	1.05×10-6	trnL-UAA;trnL-UAA	LSC;LSC
	19	6792	6792	P	34	-2	1.2×10-7	IGS	LSC;LSC
	20	65270	65270	P	34	-2	1.2×10-7	IGS	LSC;LSC
	21	85121	85121	P	34	-2	1.2×10-7	IGS	LSC;LSC
	22	110669	110701	F	34	-2	1.2×10-7	IGS	IRb;IRb
	23	110669	134486	P	34	-2	1.2×10-7	IGS	IRb;IRa
	24	110701	134518	P	34	-2	1.2×10-7	IGS	IRb;IRa
	25	134486	134518	F	34	-2	1.2×10-7	IGS	IRa;IRa
	26	96958	96958	P	33	-1	9.43×10-9	IGS	IRb;IRb
	27	96958	148230	F	33	-1	9.43×10-9	IGS	IRb;IRa
	28	148230	148230	P	33	-1	9.43×10-9	IGS	IRa;IRa
	29	61149	61158	F	33	-2	4.52×10-7	IGS	LSC;LSC
	30	128916	128921	P	33	-3	1.4×10-5	ycf1;ycf1	SSC;SSC
	31	80696	80696	R	33	-2	4.52×10-7	rpoA;rpoA	LSC;LSC
	32	92119	92140	F	32	-2	1.7×10-6	ycf2;ycf2	IRb;IRb
	33	92119	153049	P	32	-2	1.7×10-6	ycf2;ycf2	IRb;IRa
	34	92140	153070	P	32	-2	1.7×10-6	ycf2;ycf2	IRb;IRa
	35	153049	153070	F	32	-2	1.7×10-6	ycf2;ycf2	IRa;IRa
	36	8275	36903	F	32	-3	5.1×10-5	trnS-GCU;trnS-UGA	LSC;LSC
	37	47462	48448	F	32	-3	5.1×10-5	IGS	LSC;LSC
	38	10297	10388	F	31	-3	1.85×10-4	IGS;atpA	LSC;LSC
	39	29575	116237	F	31	-3	1.85×10-4	IGS	LSC;SSC
	40	52356	52365	P	31	-3	1.85×10-4	IGS	LSC;LSC
	41	118814	118839	F	31	-3	1.85×10-4	IGS	SSC;SSC
	42	85119	85124	R	31	-3	1.85×10-4	IGS	LSC;LSC
	43	116222	116234	R	31	-3	1.85×10-4	IGS	SSC;SSC
	44	8277	46481	P	30	-1	5.48×10-7	trnS-GCU;trnS-GGA	LSC;LSC
	45	8487	8511	F	30	-2	2.39×10-5	IGS	LSC;LSC
	46	45409	101563	F	30	-2	2.39×10-5	ycf3;IGS	LSC;IRb
	47	45409	143628	P	30	-2	2.39×10-5	ycf3;IGS	LSC;IRa
	48	317	379	P	30	-3	6.68×10-4	IGS	LSC;LSC
	49	6810	124453	P	30	-3	6.68×10-4	IGS;ndhA	LSC;SSC
	50	29562	51701	F	30	-3	6.68×10-4	IGS	LSC;LSC
	51	29574	116237	F	30	-3	6.68×10-4	IGS	LSC;SSC
	52	36905	46481	P	30	-3	6.68×10-4	trnS-UGA;trnS-GGA	LSC;LSC
	53	51694	128219	F	30	-3	6.68×10-4	IGS;ycf1	LSC;SSC
	54	62740	62763	F	30	-3	6.68×10-4	IGS	LSC;LSC
	55	52428	52439	R	30	-3	6.68×10-4	IGS	LSC;LSC
	56	101920	101921	R	30	-3	6.68×10-4	IGS	IRb;IRb
	57	128212	128213	R	30	-3	6.68×10-4	ycf1;ycf1	SSC;SSC
	58	143270	143271	R	30	-3	6.68×10-4	IGS	IRa;IRa
	59	101920	143270	C	30	-3	6.68×10-4	IGS	IRb;IRa
Gynandropsis gynandra	1	87243	131972	P	26181	0	6.68×10-4	-	ir
	2	40291	42515	F	76	-3	6.68×10-4	psaB;psaA	LSC;LSC
	3	40300	42524	F	67	-2	6.68×10-4	psaB;psaA	LSC;LSC
	4	92138	92162	F	65	-3	0	ycf2;ycf2	IRb;IRb
	5	92138	153169	P	65	-3	2.34×10-30	ycf2;ycf2	IRb;IRa
	6	92162	153193	P	65	-3	6.43×10-27	ycf2;ycf2	IRb;IRa
	7	153169	153193	F	65	-3	6.1×10-24	ycf2;ycf2	IRa;IRa
	8	29848	29848	P	52	-2	6.1×10-24	trnH-GUG;trnH-GUG	LSC;LSC
	9	77090	77090	P	50	0	6.1×10-24	trnH-GUG;trnH-GUG	LSC;LSC
	10	58459	58459	P	44	-2	6.1×10-24	trnH-GUG;trnH-GUG	LSC;LSC
	11	96987	96987	P	43	-3	4.14×10-18	trnH-GUG;trnH-GUG	IRb;IRb
	12	96987	148366	F	43	-3	5.55×10-21	trnH-GUG;trnH-GUG	IRb;IRa
	13	148366	148366	P	43	-3	1.94×10-13	trnH-GUG;trnH-GUG	IRa;IRa
	14	92138	92186	F	41	-3	3.03×10-11	ycf2;ycf2	IRb;IRb
	15	153169	153217	F	41	-3	3.03×10-11	ycf2;ycf2	IRa;IRa
	16	37798	37847	F	39	-3	3.03×10-11	trnH-GUG;trnH-GUG	LSC;LSC
	17	45390	101625	F	39	-3	4.19×10-10	trnH-GUG;trnH-GUG	LSC;IRb
	18	45390	143732	P	39	-3	4.19×10-10	trnH-GUG;trnH-GUG	LSC;IRa
	19	4945	4945	P	36	-2	5.74×10-9	trnH-GUG;trnH-GUG	LSC;LSC
	20	101628	123956	F	36	-3	5.74×10-9	trnH-GUG;trnH-GUG	IRb;SSC
	21	123956	143732	P	36	-3	5.74×10-9	trnH-GUG;trnH-GUG	SSC;IRa
	22	121	174	P	35	-2	8.45×10-9	trnH-GUG;trnH-GUG	LSC;LSC
	23	65282	65282	P	34	-2	2.87×10-7	trnH-GUG;trnH-GUG	LSC;LSC
	24	97020	97020	P	33	-1	2.87×10-7	trnH-GUG;trnH-GUG	IRb;IRb
	25	97020	148343	F	33	-1	3.19×10-8	trnH-GUG;trnH-GUG	IRb;IRa
	26	148343	148343	P	33	-1	1.2×10-7	trnH-GUG;trnH-GUG	IRa;IRa
	27	80773	80773	R	33	-2	9.44×10-9	rpoA;rpoA	LSC;LSC
	28	121707	121708	C	33	-2	9.44×10-9	trnH-GUG;trnH-GUG	SSC;SSC
	29	7804	7804	P	32	0	9.44×10-9	trnH-GUG;trnH-GUG	LSC;LSC
	30	8166	36862	F	32	-3	4.53×10-7	trnS-GCU;trnS-UGA	LSC;LSC
	31	37679	37679	R	32	-2	4.53×10-7	trnH-GUG;trnH-GUG	LSC;LSC
	32	44534	44537	P	31	-2	3.81×10-10	ycf3;ycf3	LSC;LSC
	33	52287	52287	R	31	-2	5.11×10-5	trnH-GUG;trnH-GUG	LSC;LSC
	34	101997	101997	R	31	-2	1.7×10-6	trnH-GUG;trnH-GUG	IRb;IRb
	35	121707	121707	R	31	-2	6.38×10-6	trnH-GUG;trnH-GUG	SSC;SSC
	36	143368	143368	R	31	-2	6.38×10-6	trnH-GUG;trnH-GUG	IRa;IRa
	37	4873	4875	R	31	-3	6.38×10-6	trnH-GUG;trnH-GUG	LSC;LSC
	38	60918	60920	R	31	-3	6.38×10-6	trnH-GUG;trnH-GUG	LSC;LSC
	39	101997	143368	C	31	-2	6.38×10-6	trnH-GUG;trnH-GUG	IRb;IRa
	40	121707	121707	P	30	0	1.85×10-4	trnH-GUG;trnH-GUG	SSC;SSC
	41	8168	46495	P	30	-1	1.85×10-4	trnS-GCU;trnS-GGA	LSC;LSC
	42	1818	1819	P	30	-2	6.38×10-6	trnK-UUU;trnK-UUU	LSC;LSC
	43	5536	5536	P	30	-2	6.1×10-9	rps16;rps16	LSC;LSC
	44	32653	32653	P	30	-2	5.49×10-7	trnH-GUG;trnH-GUG	LSC;LSC
	45	45402	101637	F	30	-2	2.39×10-5	trnH-GUG;trnH-GUG	LSC;IRb
	46	45402	143729	P	30	-2	2.39×10-5	trnH-GUG;trnH-GUG	LSC;IRa
	47	74811	74836	F	30	-2	2.39×10-5	trnH-GUG;trnH-GUG	LSC;LSC
	48	117145	117145	P	30	-2	2.39×10-5	trnH-GUG;trnH-GUG	SSC;SSC
	49	9815	9849	P	30	-3	2.39×10-5	trnH-GUG;trnH-GUG	LSC;LSC
	50	10061	43893	P	30	-3	2.39×10-5	trnH-GUG;trnH-GUG	LSC;LSC
	51	14443	14457	F	30	-3	2.39×10-5	trnH-GUG;trnH-GUG	LSC;LSC
	52	14755	29432	F	30	-3	6.69×10-4	trnH-GUG;trnH-GUG	LSC;LSC
	53	36864	46495	P	30	-3	6.69×10-4	trnS-UGA;trnS-GGA	LSC;LSC
	54	60916	83538	F	30	-3	6.69×10-4	trnH-GUG;trnH-GUG	LSC;LSC
	55	67345	67365	F	30	-3	6.69×10-4	trnH-GUG;trnH-GUG	LSC;LSC
	56	29429	130191	R	30	-3	6.69×10-4	trnH-GUG;trnH-GUG	LSC;SSC
	57	121706	121707	R	30	-3	6.69×10-4	trnH-GUG;trnH-GUG	SSC;SSC
	58	124540	129828	R	30	-3	6.69×10-4	ndhA;ycf1	SSC;SSC
